# Supplementary material for: Carbon dioxide partial pressures and emissions of the Yarlung Tsangpo River on the Tibetan Plateau
Source: Frontiers journal article supplement (doi:10.3389/fenvs.2022.1036725), 2023-01-20
Supplement: Table_1.docx [file Table_1.docx]

**Schedule 1 Information of sampling sites in the YT River basin**

| Code | M/Ta | Location | Longitude | Latitude | Altitude  (m) | Pressure  (hpa) |
| --- | --- | --- | --- | --- | --- | --- |
| S01 | M1 | Upper reaches of the YT River | 84〫27’46’’ | 29〫32’24’’ | 4395 | 580.0 |
| S02 | T1 | Wetland of Maquan River | 84〫43’46’’ | 29〫21’07’’ | 4399 | 585.0 |
| S03 | T2 | Duoxiong Zangbu River | 85〫25’29’’ | 29〫33’17’’ | 4358 | 591.0 |
| S04 | M2 | Lazi hydrological station | 87〫39’37’’ | 29〫26’18’’ | 4195 | 624.8 |
| S05 | T3 | Xiabuqu River | 88〫32’43’’ | 29〫23’07’’ | 3783 | 633.6 |
| S06 | M3 | Nugesha hydrological station | 89〫44’59’’ | 29〫18’10’’ | 3682 | 642.1 |
| S07 | T4 | Nianchu River | 88〫53’40’’ | 29〫16’59’’ | 3728 | 639.9 |
| S08 | T5 | Nimu River | 90〫11’27’’ | 29〫21’26’’ | 3637 | 645.9 |
| S09 | M4 | Qushui Bridge | 90〫41’14’’ | 29〫19’42’’ | 3591 | 657.9 |
| S10 | T6 | Lhasa River | 90〫55’49’’ | 29〫26’38’’ | 3501 | 657.3 |
| S11 | M5 | Yangcun hydrological station | 91〫49’18’’ | 29〫15’01’’ | 3412 | 665.1 |
| S12 | M6 | Upper reaches of Zangmu Reservoir | 92〫09’14’’ | 29〫12’18’’ | 3432 | 663.6 |
| S13 | M7 | Middle reaches of Zangmu Reservoir | 92〫29’03’’ | 29〫13’54’’ | 3193 | 683.9 |
| S14 | M8 | Middle reaches of Zangmu Reservoir | 92〫30’17’’ | 29〫12’36’’ | 3237 | 680,0 |
| S15 | M9 | In front of the Zangmu Dam | 92〫30’51’’ | 29〫11’23’’ | 3229 | 608.8 |
| S16 | M10 | Behind the Zangmu Dam | 92〫31’24’’ | 29〫10’39’’ | 3957 | 683.0 |
| S17 | T7 | Baqu River | 93〫39’40’’ | 29〫51’48’’ | 3121 | 716.2 |
| S18 | M11 | Nuxia hydrological station | 94〫38’25’’ | 29〫28’05’’ | 2829 | 716.2 |
| S19 | T8 | Niyang River | 93〫15’00’’ | 29〫52’54’’ | 2237 | 750.9 |
| S20 | T9 | Pailong Zangbu River | 95〫55’49’’ | 29〫26’38’’ | 2037 | 753.5 |

a M/T are short for the Mainstream/Tributary.
